# Supplementary material for: Structure of mammalian Mediator complex reveals Tail module architecture and interaction with a conserved core
Source: PubMed Central journal article supplement (PMC7921410; doi:10.1038/s41467-021-21601-w), 2021-03-01
Supplement: 41467_2021_21601_MOESM1_ESM.pdf [file 41467_2021_21601_MOESM1_ESM.pdf]

## **Structure of mammalian Mediator complex reveals Tail module architecture and interaction with a conserved core**

Haiyan Zhao<sup>1,#</sup>, Natalie Young<sup>1,#</sup>, Jens Kalchschmidt<sup>2,#</sup>, Jenna Lieberman<sup>2</sup>, Laila El Khattabi<sup>3</sup>, Rafael Casellas<sup>2,4</sup> and Francisco J. Asturias<sup>1,\*</sup>

<sup>1</sup>Department of Biochemistry and Molecular Genetics, University of Colorado Anschutz Medical School, Aurora CO 80045, USA

<sup>2</sup>Lymphocyte Nuclear Biology, NIAMS, NIH, Bethesda, MD 20892, USA

<sup>3</sup>Institut Cochin Laboratoire de Cytogénétique Constitutionnelle Pré et Post Natale, 75014 Paris France

<sup>4</sup>Center for Cancer Research, NCI, NIH, Bethesda, MD 20892, USA

#.\*These authors contributed equally to this work

\*Correspondence should be addressed to F.J.A. ([Francisco.Asturias@CUAnschutz.edu](mailto:Francisco.Asturias@CUAnschutz.edu))

**Supplementary Table 1. MudPIT analysis of purified mMED fractions used for cryo-EM analysis**

| Identified Proteins                                         | Accession Identifier | Molecular Weight | MED19-FLAG Peptide Counts |
|-------------------------------------------------------------|----------------------|------------------|---------------------------|
| Mediator of RNA polymerase II transcription subunit 12      | MED12_MOUSE          | 245 kDa          | 290                       |
| Mediator of RNA polymerase II transcription subunit 14      | MED14_MOUSE          | 161 kDa          | 276                       |
| Actin, cytoplasmic 2                                        | ACTG_MOUSE           | 42 kDa           | 241                       |
| Mediator of RNA polymerase II transcription subunit 13-like | MD13L_MOUSE          | 242 kDa          | 224                       |
| Mediator of RNA polymerase II transcription subunit 23      | MED23_MOUSE          | 156 kDa          | 220                       |
| DNA-directed RNA polymerase II subunit RPB1                 | RPB1_MOUSE           | 217 kDa          | 216                       |
| Mediator of RNA polymerase II transcription subunit 1       | MED1_MOUSE           | 167 kDa          | 163                       |
| Mediator of RNA polymerase II transcription subunit 24      | MED24_MOUSE          | 110 kDa          | 159                       |
| Mediator of RNA polymerase II transcription subunit 16      | MED16_MOUSE          | 92 kDa           | 153                       |
| DNA-directed RNA polymerase II subunit RPB2                 | RPB2_MOUSE           | 134 kDa          | 136                       |
| Mediator of RNA polymerase II transcription subunit 17      | MED17_MOUSE          | 72 kDa           | 132                       |
| Myosin-9                                                    | MYH9_MOUSE           | 226 kDa          | 124                       |
| Serine/threonine-protein kinase 38                          | STK38_MOUSE          | 54 kDa           | 117                       |
| Unconventional myosin-le                                    | MYO1E_MOUSE          | 127 kDa          | 99                        |
| Actin, alpha cardiac muscle 1                               | ACTC_MOUSE           | 42 kDa           | 91                        |
| Mediator of RNA polymerase II transcription subunit 15      | MED15_MOUSE          | 87 kDa           | 87                        |
| Gelsolin                                                    | GELS_MOUSE           | 86 kDa           | 82                        |
| Mediator of RNA polymerase II transcription subunit 27      | MED27_MOUSE          | 35 kDa           | 78                        |
| Mediator of RNA polymerase II transcription subunit 4       | MED4_MOUSE           | 30 kDa           | 67                        |
| Tropomodulin-3                                              | TMOD3_MOUSE          | 40 kDa           | 67                        |
| Unconventional myosin-XVIIIa                                | MY18A_MOUSE          | 233 kDa          | 66                        |
| Advillin                                                    | AVIL_MOUSE           | 92 kDa           | 62                        |
| Beta-actin-like protein 2                                   | ACTBL_MOUSE          | 42 kDa           | 62                        |
| Mediator of RNA polymerase II transcription subunit 8       | MED8_MOUSE           | 29 kDa           | 57                        |
| Mediator of RNA polymerase II transcription subunit 7       | MED7_MOUSE           | 27 kDa           | 53                        |
| Mediator of RNA polymerase II transcription subunit 26      | MED26_MOUSE          | 65 kDa           | 52                        |
| Mediator of RNA polymerase II transcription subunit 19      | MED19_MOUSE          | 26 kDa           | 52                        |
| Mediator of RNA polymerase II transcription subunit 10      | MED10_MOUSE          | 16 kDa           | 48                        |
| DNA-directed RNA polymerase II subunit RPB3                 | RPB3_MOUSE           | 31 kDa           | 46                        |
| Mediator of RNA polymerase II transcription subunit 20      | MED20_MOUSE          | 23 kDa           | 46                        |
| Mediator of RNA polymerase II transcription subunit 6       | MED6_MOUSE           | 28 kDa           | 45                        |
| Cyclin-dependent kinase 8                                   | CDK8_MOUSE           | 53 kDa           | 42                        |
| Mediator of RNA polymerase II transcription subunit 11      | MED11_MOUSE          | 13 kDa           | 42                        |
| Mediator of RNA polymerase II transcription subunit 21      | MED21_MOUSE          | 16 kDa           | 35                        |
| DNA-directed RNA polymerase II subunit RPB7                 | RPB7_MOUSE           | 19 kDa           | 35                        |

|                                                            |             |         |    |
|------------------------------------------------------------|-------------|---------|----|
| Mediator of RNA polymerase II transcription subunit 28     | MED28_MOUSE | 20 kDa  | 34 |
| Mediator of RNA polymerase II transcription subunit 30     | MED30_MOUSE | 20 kDa  | 34 |
| Mediator of RNA polymerase II transcription subunit 22     | MED22_MOUSE | 22 kDa  | 33 |
| Cyclin-dependent kinase 19                                 | CDK19_MOUSE | 57 kDa  | 33 |
| Thyroid hormone receptor-associated protein 3              | TR150_MOUSE | 108 kDa | 30 |
| Mediator of RNA polymerase II transcription subunit 18     | MED18_MOUSE | 24 kDa  | 28 |
| Unconventional myosin-Ic                                   | MYO1C_MOUSE | 122 kDa | 28 |
| DNA-directed RNA polymerases I, II, and III subunit RPABC1 | RPAB1_MOUSE | 25 kDa  | 27 |
| Mediator of RNA polymerase II transcription subunit 29     | MED29_MOUSE | 21 kDa  | 27 |
| F-actin-capping protein subunit beta                       | CAPZB_MOUSE | 31 kDa  | 27 |
| Unconventional myosin-Ig                                   | MYO1G_MOUSE | 117 kDa | 27 |
| Mediator of RNA polymerase II transcription subunit 31     | MED31_MOUSE | 16 kDa  | 25 |
| DNA-directed RNA polymerase II subunit RPB9                | RPB9_MOUSE  | 15 kDa  | 25 |
| Mediator of RNA polymerase II transcription subunit 9      | MED9_MOUSE  | 16 kDa  | 24 |
| Actin-related protein 3                                    | ARP3_MOUSE  | 47 kDa  | 24 |
| Myosin regulatory light chain 12B                          | ML12B_MOUSE | 20 kDa  | 23 |
| Probable helicase senataxin                                | SETX_MOUSE  | 298 kDa | 22 |
| Myosin light polypeptide 6                                 | MYL6_MOUSE  | 17 kDa  | 20 |
| Calmodulin                                                 | CALM_MOUSE  | 17 kDa  | 19 |
| Cyclin-C                                                   | CCNC_MOUSE  | 33 kDa  | 18 |
| Heat shock cognate 71 kDa protein                          | HSP7C_MOUSE | 71 kDa  | 17 |
| DNA-directed RNA polymerase II subunit RPB4                | RPB4_MOUSE  | 16 kDa  | 17 |
| Mediator of RNA polymerase II transcription subunit 25     | MED25_MOUSE | 78 kDa  | 17 |
| F-actin-capping protein subunit alpha-1                    | CAZA1_MOUSE | 33 kDa  | 17 |
| Keratin, type I cytoskeletal 10                            | K1C10_MOUSE | 58 kDa  | 17 |
| Actin-related protein 2                                    | ARP2_MOUSE  | 45 kDa  | 15 |
| DNA-directed RNA polymerases I, II, and III subunit RPABC3 | RPAB3_MOUSE | 17 kDa  | 14 |
| Unconventional myosin-Va                                   | MYO5A_MOUSE | 216 kDa | 13 |
| Tubulin beta-5 chain                                       | TBB5_MOUSE  | 50 kDa  | 13 |
| Unconventional myosin-IId                                  | MYO1D_MOUSE | 116 kDa | 12 |
| DNA-directed RNA polymerase II subunit RPB11               | RPB11_MOUSE | 13 kDa  | 11 |
| DNA-directed RNA polymerases I, II, and III subunit RPABC5 | RPAB5_MOUSE | 8 kDa   | 11 |
| F-actin-capping protein subunit alpha-2                    | CAZA2_MOUSE | 33 kDa  | 11 |
| Actin-related protein 2/3 complex subunit 1B               | ARC1B_MOUSE | 41 kDa  | 11 |
| Actin-related protein 2/3 complex subunit 4                | ARPC4_MOUSE | 20 kDa  | 11 |
| Enhancer of rudimentary homolog                            | ERH_MOUSE   | 12 kDa  | 10 |
| Keratin, type II cytoskeletal 1                            | K2C1_MOUSE  | 66 kDa  | 10 |
| Actin-related protein 2/3 complex subunit 2                | ARPC2_MOUSE | 34 kDa  | 10 |

|                                                          |                         |         |    |
|----------------------------------------------------------|-------------------------|---------|----|
| Plastin-2                                                | PLSL_MOUSE              | 70 kDa  | 10 |
| Keratin, type II cytoskeletal 5                          | K2C5_MOUSE              | 62 kDa  | 9  |
| Keratin, type I cytoskeletal 13                          | K1C13_MOUSE             | 48 kDa  | 9  |
| Keratin, type I cytoskeletal 14                          | K1C14_MOUSE             | 53 kDa  | 8  |
| Keratin, type II cytoskeletal 73                         | K2C73_MOUSE             | 59 kDa  | 8  |
| Bcl-2-associated transcription factor 1                  | BCLF1_MOUSE             | 106 kDa | 8  |
| Myosin light chain kinase 2, skeletal/cardiac muscle     | MYLK2_MOUSE             | 66 kDa  | 7  |
| 78 kDa glucose-regulated protein                         | GRP78_MOUSE             | 72 kDa  | 6  |
| Actin-related protein 2/3 complex subunit 3              | ARPC3_MOUSE             | 21 kDa  | 6  |
| Spindlin-1                                               | SPIN1_MOUSE             | 30 kDa  | 5  |
| Gamma-adducin                                            | ADDG_MOUSE              | 79 kDa  | 5  |
| Alpha-adducin                                            | ADDA_MOUSE              | 81 kDa  | 4  |
| Tubulin alpha-1B chain                                   | TBA1B_MOUSE (+1)        | 50 kDa  | 4  |
| Lymphocyte-specific protein 1                            | LSP1_MOUSE              | 37 kDa  | 4  |
| E3 ubiquitin-protein ligase TRIM21                       | RO52_MOUSE              | 54 kDa  | 4  |
| Elongation factor 1-alpha 1                              | EF1A1_MOUSE             | 50 kDa  | 3  |
| Actin-related protein 2/3 complex subunit 5-like protein | ARP5L_MOUSE             | 17 kDa  | 3  |
| Collagen alpha-2(I) chain                                | CO1A2_MOUSE             | 130 kDa | 3  |
| Q3TTY5 K22E_MOUSE-DECOY                                  | Q3TTY5 K22E_MOUSE-DECOY | ?       | 2  |
| U4/U6 small nuclear ribonucleoprotein Prp4               | PRP4_MOUSE              | 58 kDa  | 2  |

  

|                       |
|-----------------------|
| Mediator Subunit      |
| RNAPII Subunit        |
| Kinase Module Subunit |
| Uncommon Contaminant  |

**Supplementary Table 2. Cryo-EM data collection, processing and model validation statistics**

| <b>Data collection and Processing</b>              |                                        |
|----------------------------------------------------|----------------------------------------|
| Microscope                                         | Talos Arctica (ThermoFisher)           |
| Detector                                           | K3 Summit (Gatan)                      |
| Voltage (keV)                                      | 200                                    |
| Defocus range ( $\mu\text{m}$ )                    | 0.8 - 3.5                              |
| Number of movies (0°/20°/30°/40° tilt)             | 2,705/6,464/2,928/1,495 (13,592 total) |
| Frames per movie                                   | 40 - 60                                |
| Exposure time per frames (ms)                      | 75 - 100                               |
| Magnification                                      | 36,000x                                |
| Pixel size ( $\text{\AA}$ )                        | 1.11                                   |
| Dose rate ( $\text{e}^-/\text{pixel}/\text{sec}$ ) | 19 - 22                                |
| Total dose per movie ( $\text{e}^-/\text{\AA}^2$ ) | 50 - 80                                |
| Initial number of particle images                  | 2,319,481                              |
| Final number of particle images                    | 217,557                                |
| Particle symmetry                                  | C1                                     |
| Overall map resolution ( $\text{\AA}$ )            | 4.0                                    |
| FSC threshold                                      | 0.143                                  |
| Map resolution range ( $\text{\AA}$ )              | 3.4 - >10                              |
| Directional resolution range ( $\text{\AA}$ )      | 3.4 - 6.8                              |
| Sphericity of 3D FSC                               | 0.838                                  |
| Map sharpening B-factor ( $\text{\AA}^2$ )         | 74                                     |
|                                                    |                                        |
| <b>Atomic model validation statistics</b>          |                                        |
| <b>Model Composition</b>                           |                                        |
| Protein Chains                                     | 25                                     |
| Protein Residues                                   | 7,434                                  |
| Non-hydrogen atoms                                 | 47,305                                 |
| <b>R.M.S deviations</b>                            |                                        |
| Bond lengths ( $\text{\AA}$ )                      | 0.003                                  |
| Bond angles ( $^\circ$ )                           | 0.682                                  |
| <b>Validation</b>                                  |                                        |
| MolProbity score                                   | 2.07                                   |
| Clashscore                                         | 8.11                                   |
| Poor rotamers (%)                                  | 0                                      |
| <b>Ramachandran plot</b>                           |                                        |
| Favored (%)                                        | 86.86                                  |
| Allowed (%)                                        | 13.02                                  |
| Disallowed (%)                                     | 0.13                                   |

**Supplementary Table 3: Subunit module assignment and atomic model information**

| MmMED Subunit | Chain ID | Module      | Color         | # of Residues | Residues in atomic model (%) |
|---------------|----------|-------------|---------------|---------------|------------------------------|
| MED1          | A        | Middle      | purple        | 1575          | ~1-520 (33)                  |
| MED4          | B        | Middle      | light blue    | 270           | 30-129 (37)                  |
| MED6          | C        | Head        | yellow        | 246           | 9-246 (97)                   |
| MED7          | D        | Middle      | sandy brown   | 233           | 11-167 (67)                  |
| MED8          | E        | Head        | forest green  | 268           | 7-186 (67)                   |
| MED9          | F        | Middle      | hot pink      | 142           | 61-136 (53)                  |
| MED10         | G        | Middle      | magenta       | 135           | 61-130 (52)                  |
| MED11         | H        | Head        | orange red    | 117           | 8-115 (92)                   |
| MED14         | I        | -           | green         | 1459          | 149-975/1172-1450 (76)       |
| MED15         | J        | Tail        | red           | 789           | 620-787 (21)                 |
| MED16         | K        | Tail        | khaki         | 828           | 3-825 (99)                   |
| MED17         | L        | Head        | dodger blue   | 649           | 15-645 (97)                  |
| MED18         | M        | Head        | tan           | 208           | 17-203 (90)                  |
| MED19         | N        | Middle      | navy blue     | 244           | 78-136 (24)                  |
| MED20         | O        | Head        | cyan          | 212           | 3-200 (93)                   |
| MED21         | P        | Middle      | dark green    | 144           | 3-128 (88)                   |
| MED22         | Q        | Head        | medium purple | 200           | 9-139 (66)                   |
| MED23         | R        | Tail        | plum          | 1367          | 1-1334 (98)                  |
| MED24         | S        | Tail        | dark cyan     | 987           | 4-985 (99)                   |
| MED25         | T        | Tail        | salmon        | 745           | 5-216 (28)                   |
| MED26         | U        | Middle-Head |               | 588           | Not included                 |
| MED27         | V        | Tail        | violet red    | 311           | 8-304 (95)                   |
| MED28         | W        | Tail        | goldenrod     | 178           | 32-149 (66)                  |
| MED29         | X        | Tail        | blue          | 199           | 52-185 (67)                  |
| MED30         | Y        | Tail        | olive drab    | 178           | 27-178 (85)                  |
| MED31         | Z        | Middle      | firebrick     | 131           | 13-105 (71)                  |

**Supplementary Table 4: Primer and cloning strategy for cell line creation.**

| Med14 $\Delta$ 1206-1458 truncation in CH12 Med25Flag/Flag cells                                |                            |                          |                                                              |
|-------------------------------------------------------------------------------------------------|----------------------------|--------------------------|--------------------------------------------------------------|
| sgRNA                                                                                           |                            | sgRNA sequence           |                                                              |
| sgRNA 1 cutting close to aa1206                                                                 |                            | TCCAAGGAATCTCTCAAGTG     |                                                              |
| sgRNA 2 cutting close to stop codon                                                             |                            | CTATGGACGCCACCAGGGGG     |                                                              |
| Med15-HMP overexpression in CH12 Med13 <sup>-/-</sup> Med19Flag/Flag Med15 <sup>-/-</sup> cells |                            |                          |                                                              |
| PCR                                                                                             | Template DNA               | Primer name              | Sequence (5' - 3')                                           |
| Med15 amplification from cDNA                                                                   | CH12 cDNA                  | Med15 mRNA F             | atggacgtttcggggcagga                                         |
|                                                                                                 |                            | Med15 mRNA R             | ggcagctgagaggcaggcct                                         |
| Pre-Stitch PCR1                                                                                 | Med15 cDNA amplification   | Cterm pMY-Med15 Stitch F | GGAATTCCTGCAGGCCGCCACCatggacgtttcggggcagga                   |
|                                                                                                 |                            | Cterm Med15-HMP R        | CGTTAATCCAGATTACCAGTTTACCTTCTTCGATCATCCCggcagctgagaggcaggcct |
| Pre-Stitch PCR2                                                                                 | HMP-P2A-EGFP construct     | Cterm Med15-HMP F        | gcccagagcatccaccaggcctgcctctcagctgccGGGATGATCGAAGAAGGTAAACTG |
|                                                                                                 |                            | pMY Rev Sall             | CCCGGTCGACgcgccGCTTAC                                        |
| Stitch PCR                                                                                      | Pre-Stitch PCR1&2 products | Cterm pMY-Med15 Stitch F | GGAATTCCTGCAGGCCGCCACCatggacgtttcggggcagga                   |
|                                                                                                 |                            | pMY Rev Sall             | CCCGGTCGACgcgccGCTTAC                                        |

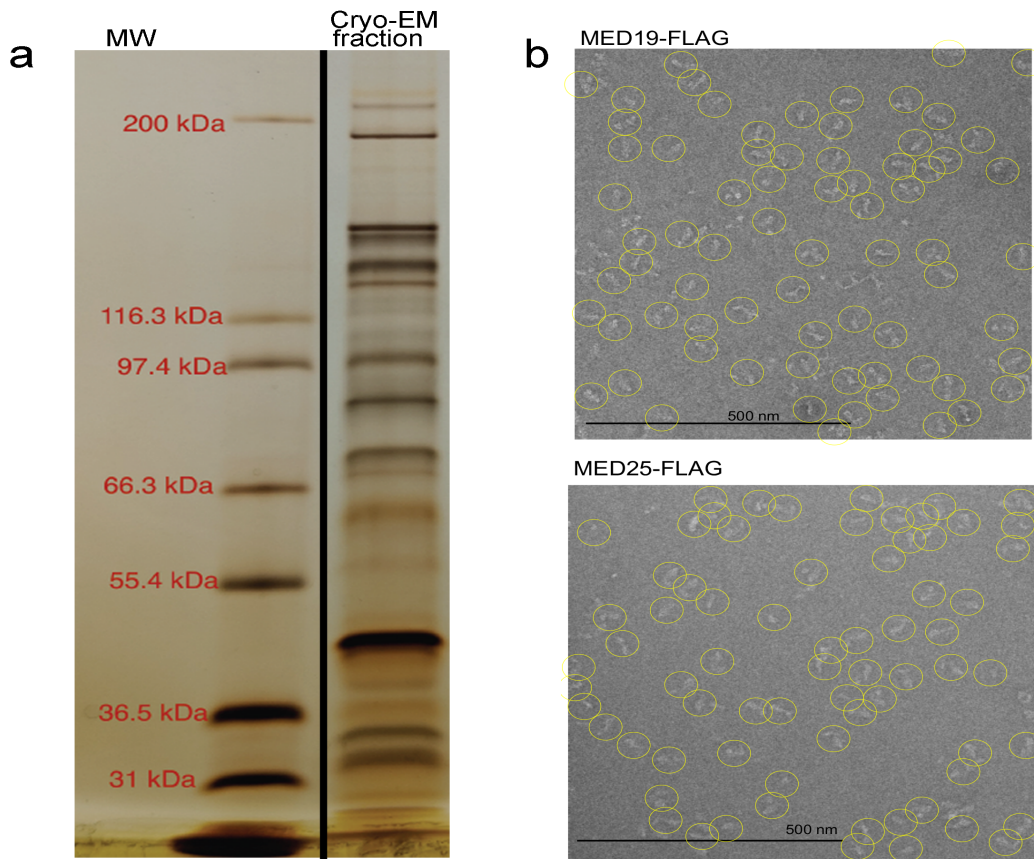

**Supplementary Figure 1. SDS-PAGE and EM in stain analyses of mMED preparations used for cryo-EM.** **a**, SDS-PAGE analysis of a typical MED25-FLAG purified mMED fraction used for cryo-EM analysis. **b**, Images of MED19-FLAG and MED25-FLAG mMED preserved in stain show homogenous particles and absence of any non-Mediator contaminants. Yellow circles highlight individual particles. Scale bars correspond to 500nm. These micrographs are representative of hundreds of micrographs used to ascertain the purity of mMED preparations used for various EM studies in stain and cryo.



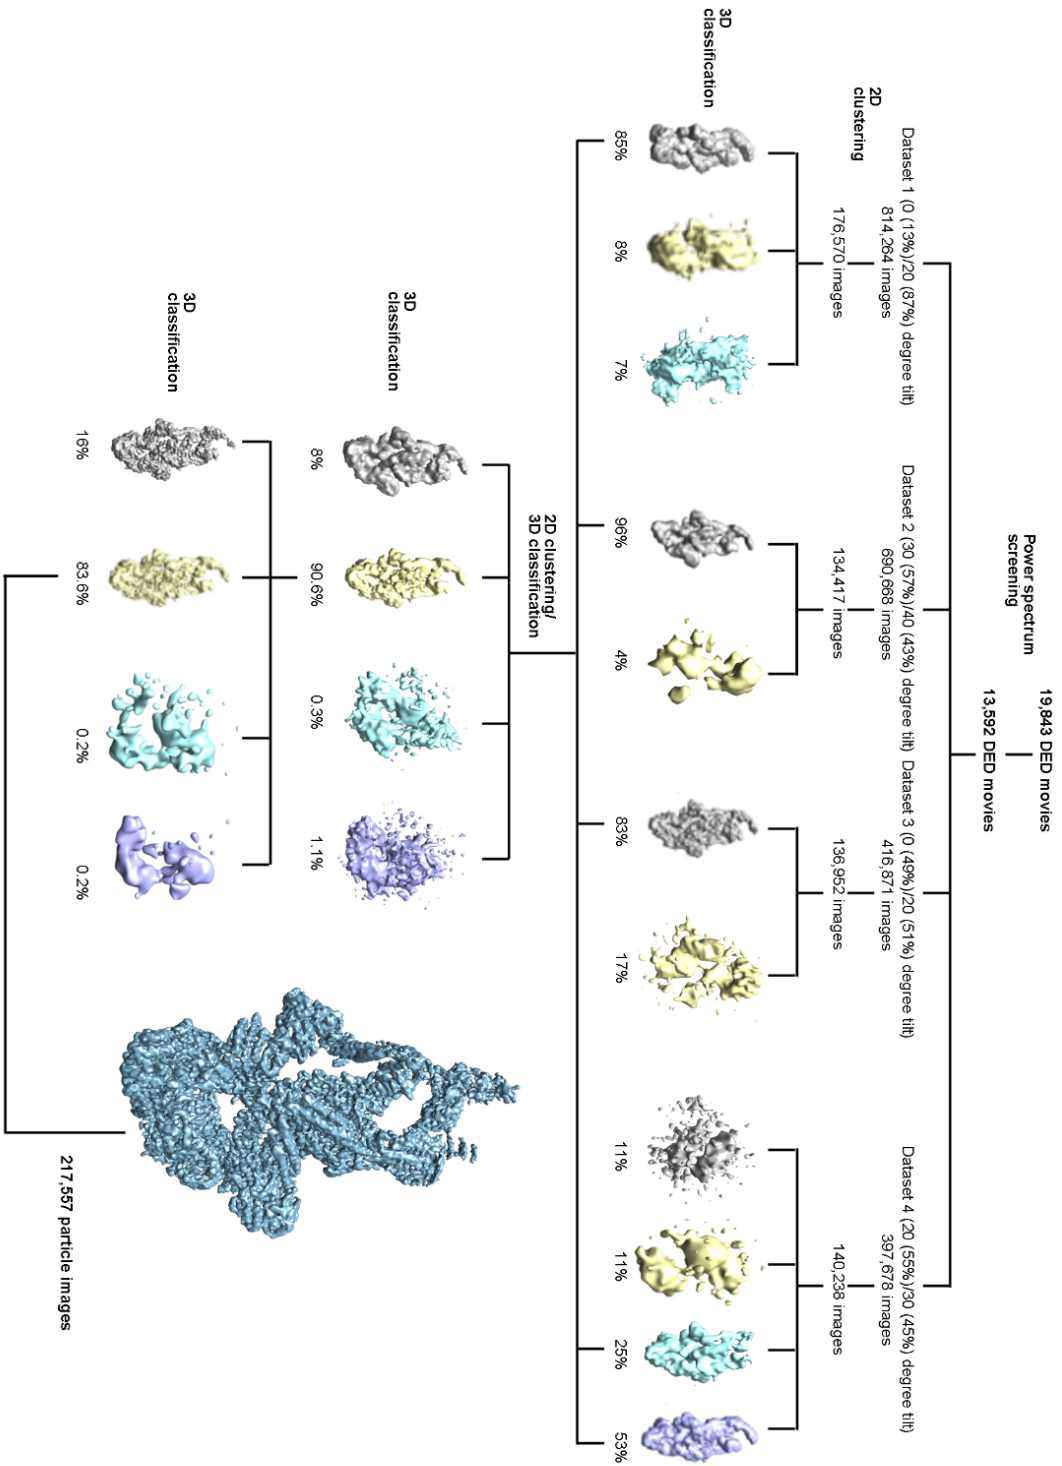

**Supplementary Figure 2. 2D clustering and 3D classification diagram for mMED cryo-EM analysis.** Sequence of power spectra screening, 2D clustering and 3D classification steps during selection and analysis of mMED cryo-EM particle images.

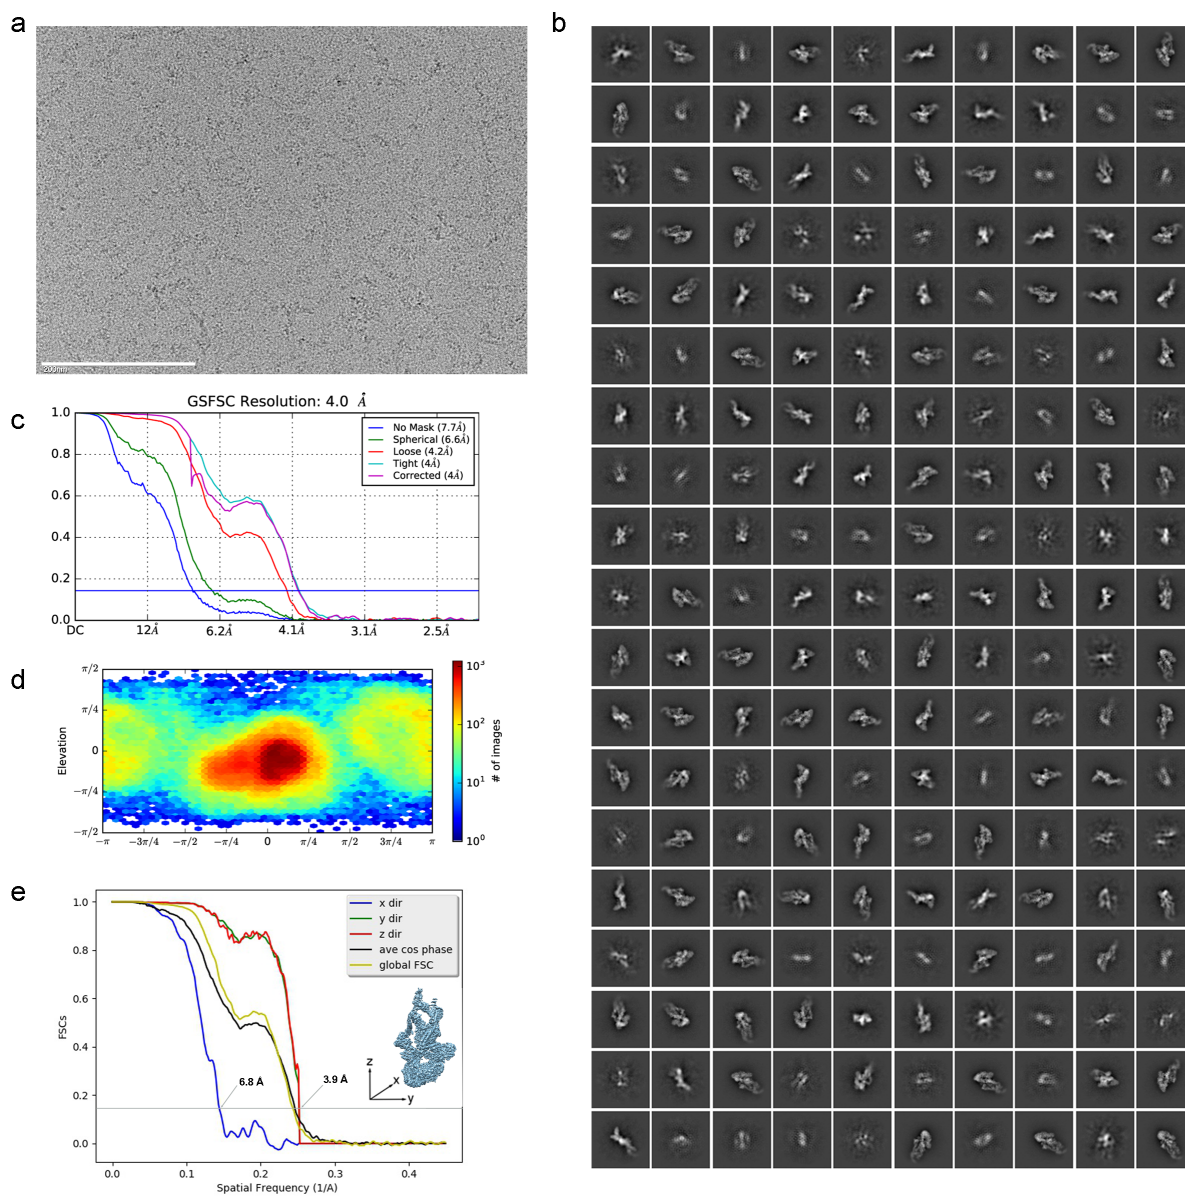

**Supplementary Figure 3. mMED cryo-EM analysis.** **a**, Typical mMED micrograph showing particles cryo-preserved on a thin carbon film ( $0^\circ$  tilt). Scale bar 200nm. This micrograph is representative of many thousands of micrographs collected in the course of the cryo-EM studies described here. **b**, 2D class averages obtained from clustering of a combination of untilted and tilted mMED images. **c**, Fourier Shell Correlation (FSC) plot used to estimate the resolution of the mMED cryo-EM map to  $4.0\text{\AA}$ . **d**, Angular distribution plot for the final combined mMED cryo-EM dataset. **e**, Directional FSC plots showing the resolution of the mMED cryo-EM map along 3 perpendicular directions.

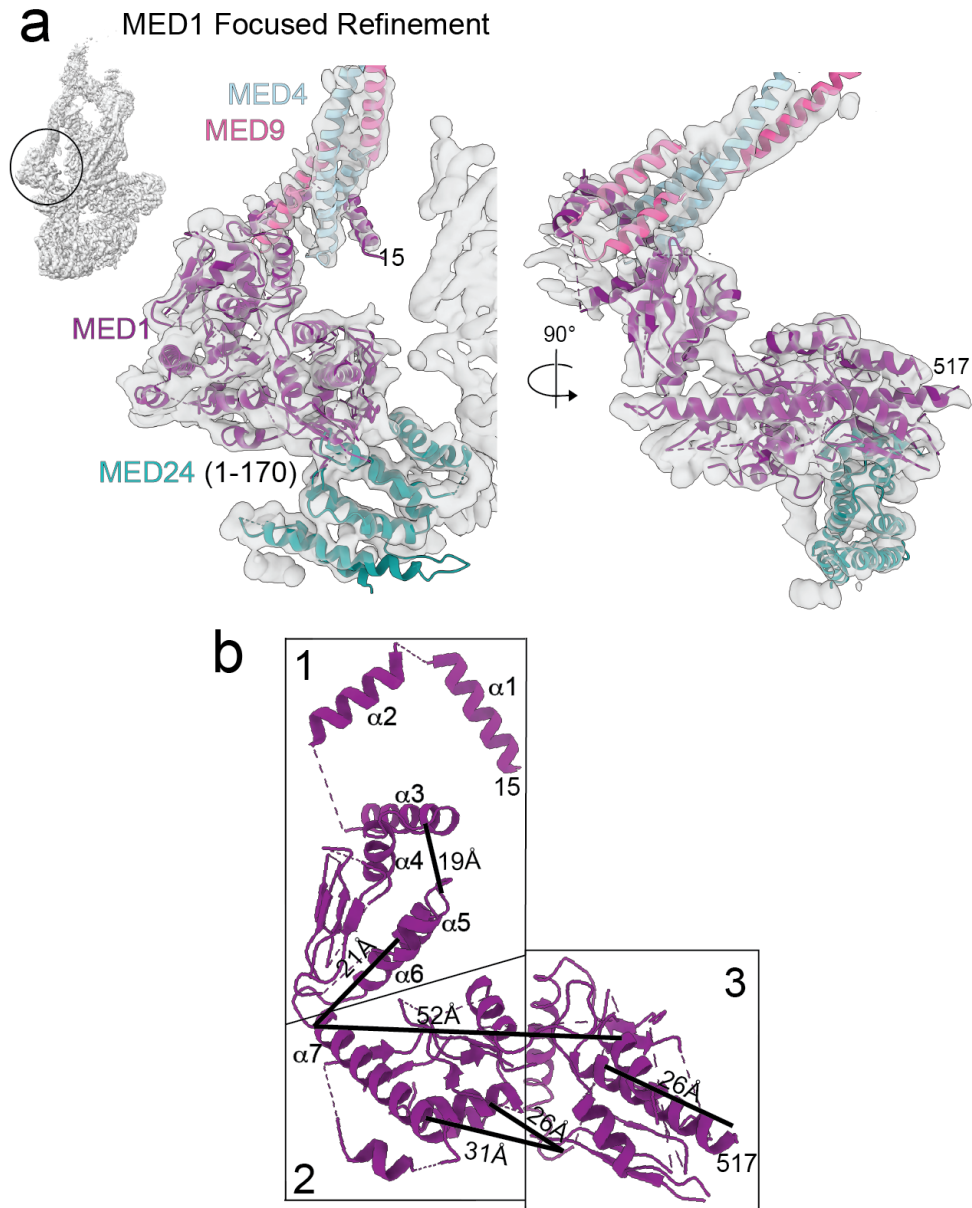

**Supplementary Figure 4. Focused refinement map and structure of the MED1 portion of the Middle module.** Focused refinement map including MED1 and neighboring portions of MED4, MED9, MED14 and MED24 (as indicated in left insert) and partial model of MED1 (~aa 1-520) showing its interaction with MED4-MED9 and MED24. The MED1 N-terminus wraps around the bottom portion of MED4-MED9 (in light blue and pink, respectively) and a N-terminal  $\alpha$ -helix contacts both subunits. From there, alternating  $\beta$ -strand and  $\alpha$ -helical domains extend to contact the very N-terminal portion of MED24 (in dark cyan) through an extended  $\beta$ -sheet domain. With its alternating arrangement of helices and strands, the structure of the ordered N-terminal portion of MED1 is reminiscent of MED14 and could undergo conformational rearrangements allowing the Middle to move without breaking its contact with MED24.

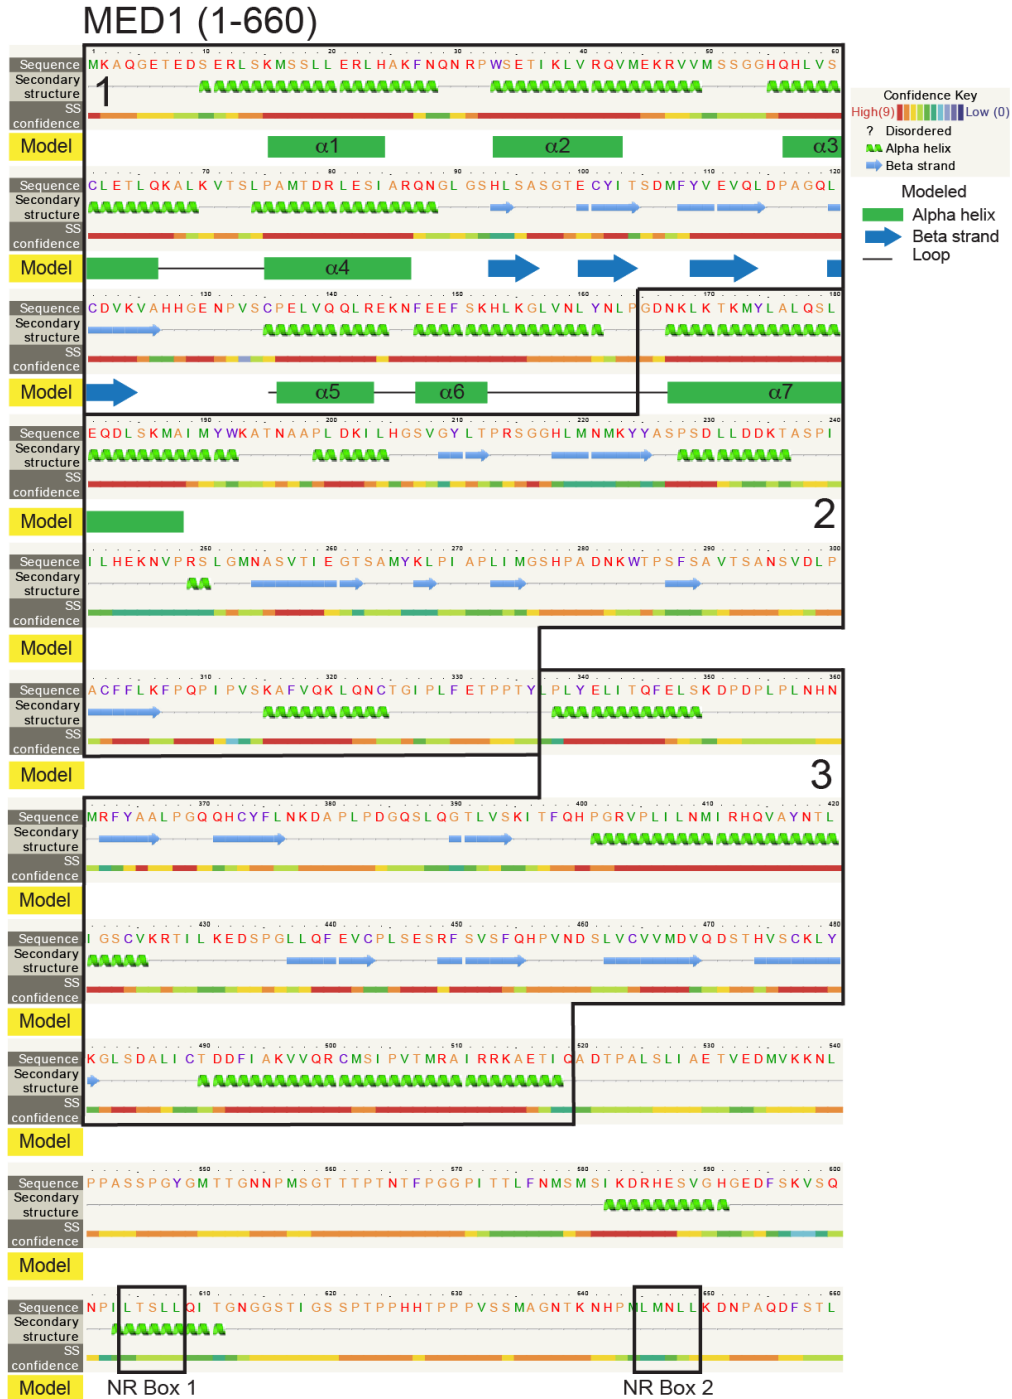

**Supplementary Figure 5. Secondary structure prediction for the N-terminal portion of MED1 in the Middle module.** Secondary structure prediction for the MED1 N-terminal region (aa 1-660) calculated using Phyre2<sup>35</sup>. Three regions, delineated as indicated by black outlines, correspond to portions of the partial MED1 model shown in Supplementary Fig. 4. Region 3 includes  $\beta$ -strands that interact directly with a hydrophobic patch on the MED24 N-terminus. No ordered domains are predicted after the first ~700 aa, which means that the entire C-terminal portion of MED1 (~900 residues or >55% of the 1575 aa protein) are disordered.

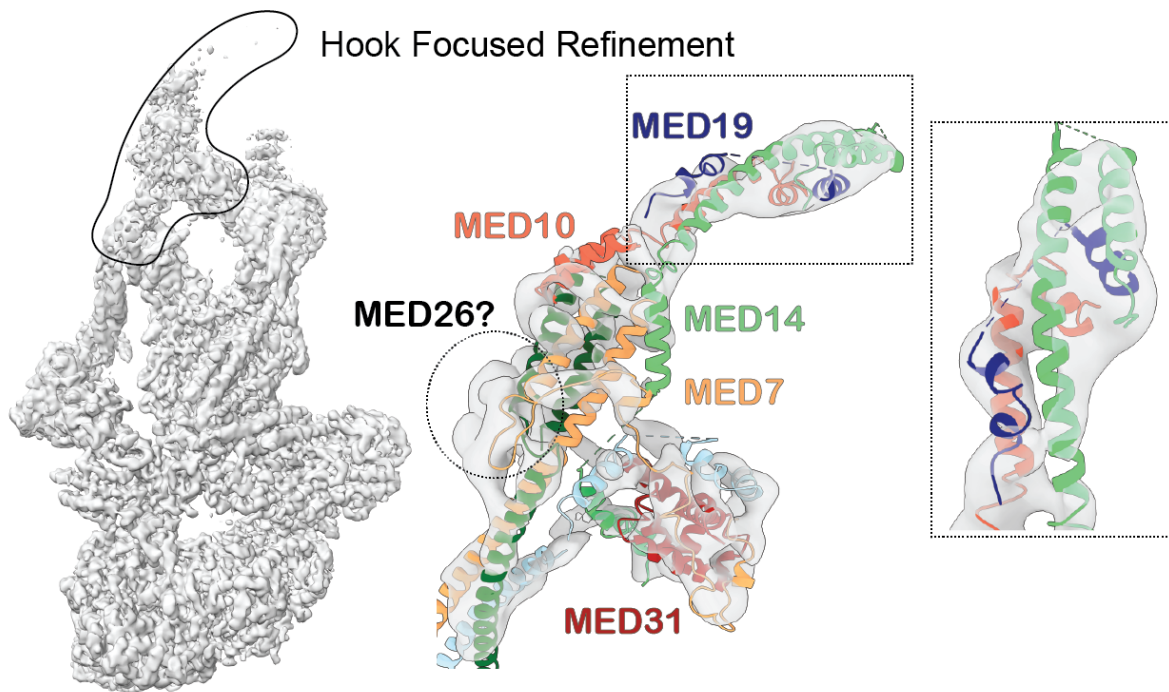

**Supplementary Figure 6. Focused refinement map and structure of the hook portion of the Middle module.** Focused refinement map of the hook/knob portion of the Middle module and models of the corresponding subunits fitted into the map.



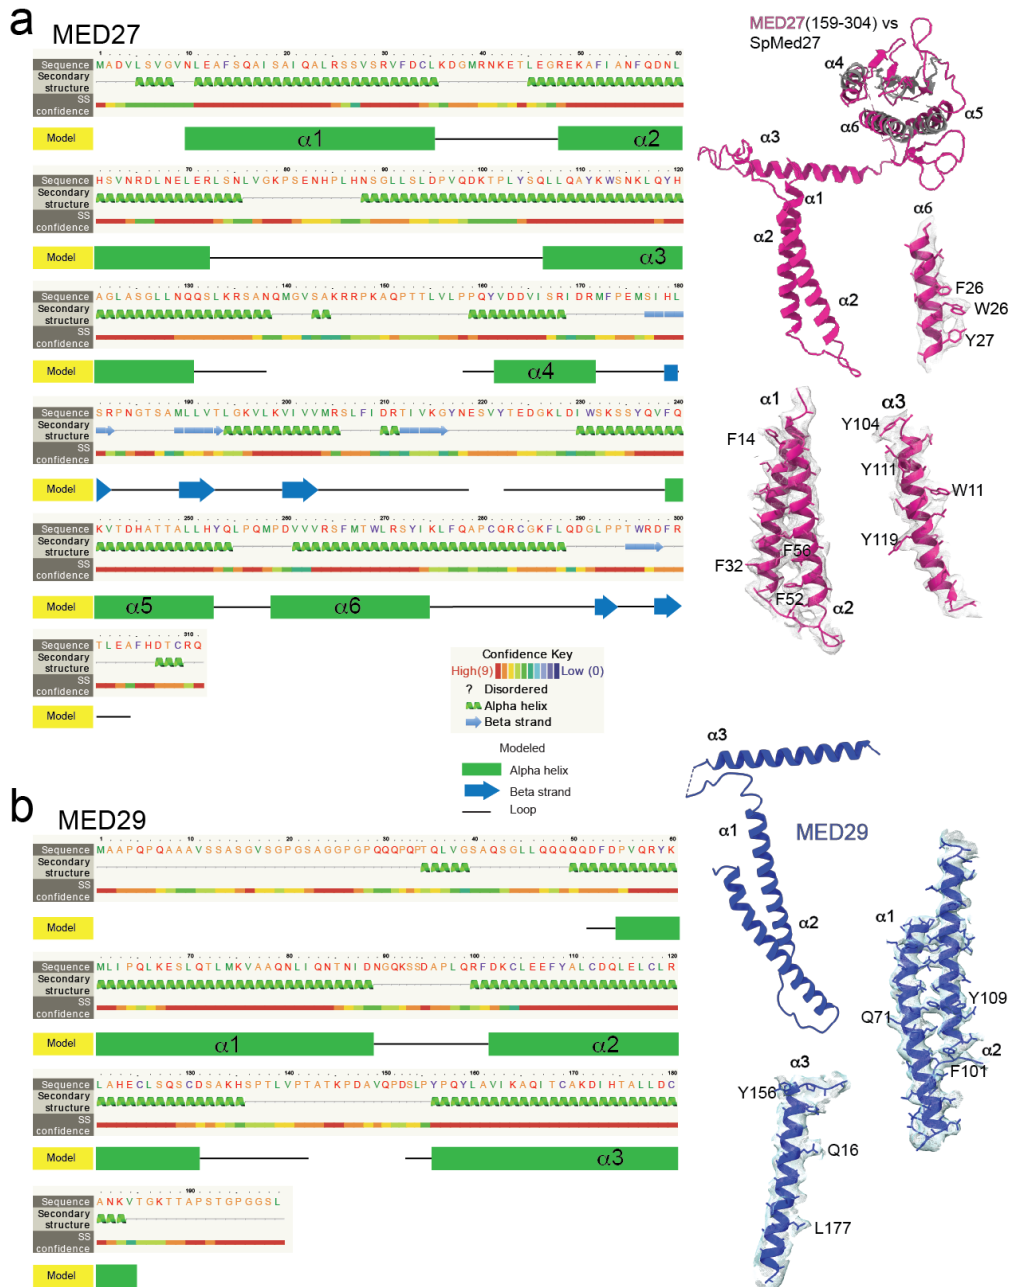

**Supplementary Figure 8. Interpretation and structure of upper Tail subunits MED27/MED29.** Secondary structure predictions for MED27/MED29 (left) calculated using Phyre2<sup>35</sup> show that both subunits (which are very similar in size) are expected to have the same overall secondary structure, but that the length of specific  $\alpha$ -helices and loops differs between them. MED27 also has a unique globular C-terminal domain. This, and clear bulky side-chain densities in the corresponding portions of the mMED cryo-EM map (right) made possible building an accurate model of these two upper Tail subunits.

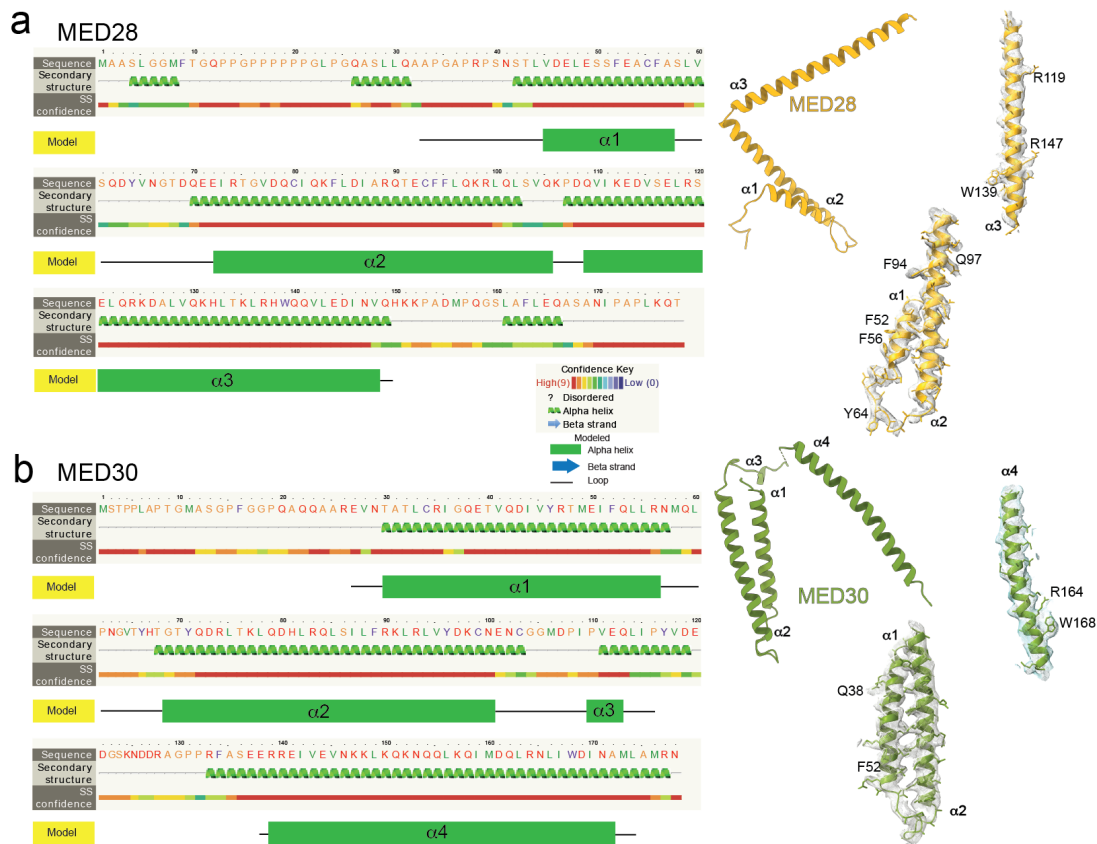

**Supplementary Figure 9. Interpretation and structure of upper Tail subunits MED28/MED30.** Secondary structure predictions for MED28/MED30 (left) calculated using Phyre2<sup>35</sup> show that both subunits (which are very similar in size) are expected to have the same overall secondary structure, but that the length of specific  $\alpha$ -helices and loops differs between them. This, and clear bulky side-chain densities in the corresponding portions of the mMED cryo-EM map (right) made possible building an accurate model of these two upper Tail subunits.



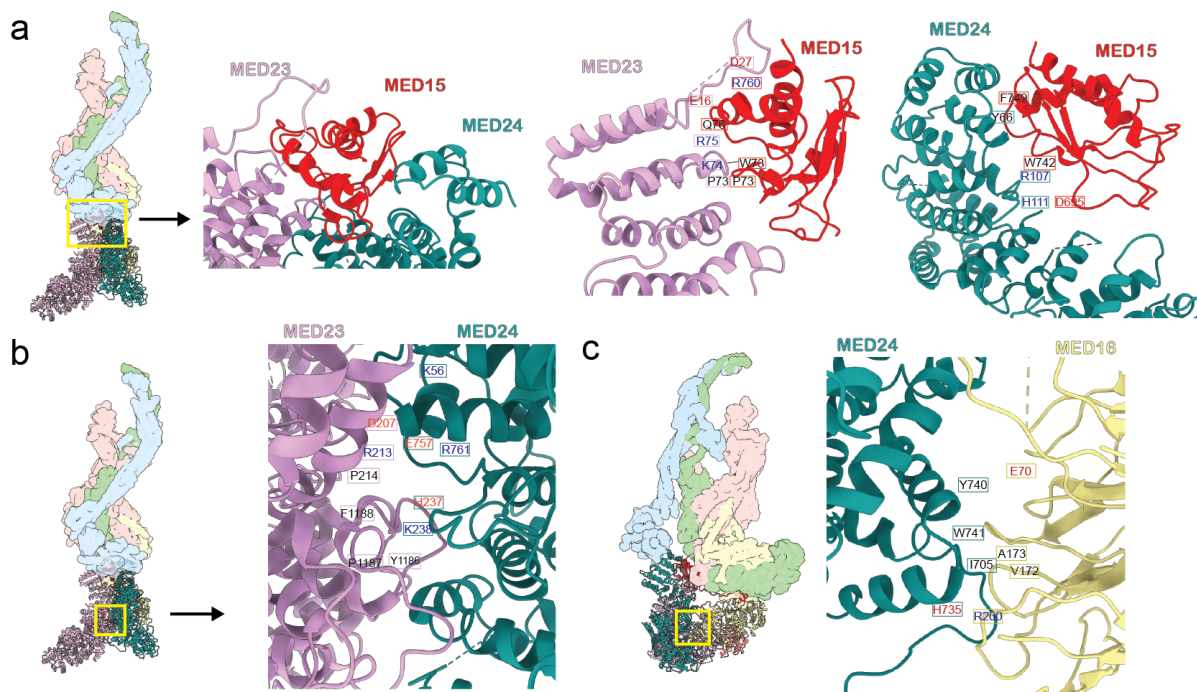

**Supplementary Figure 10. Inter-subunit contacts in the lower Tail.** Lower Tail subunit interfaces show a number of charged, hydrophobic and cationic- $\pi$  interactions, which are depicted by coloring the involved residues in black (polar and hydrophobic amino acids), red (negatively charged) and blue (positively charged). **a**, Interaction of MED15 with MED23 and MED24. The MED15/MED23 interface shows electrostatic interactions between MED23 D27, E16, R75 and MED15 R760 and Q763, with potential hydrogen-bonding between MED23 E16 and MED15 Q763. There is a cationic- $\pi$  interaction between MED23 K74 and MED15 W737, followed by hydrophobic-interaction between MED23 P73 and MED15 P735. The MED15/MED24 interface includes hydrophobic (MED24 Y66-MED15 F749), cationic- $\pi$  (MED24 R107-MED15 W742), and electrostatic (MED24 H111-MED15 D695) interactions. **b**, In the MED23/MED24 interface. MED23 D207 interacts with K56 and R761 on MED24 to form an electrostatic interface, with a potential salt-bridge between MED23 R213 and MED24 E757. Below this interaction, there is an aromatic cluster formed by MED23 P214, F1188, P1187, Y1186 and MED24 H237, with a cationic- $\pi$  interaction between MED23 F1188 and MED24 K238. **c**, At the MED16/MED24 interface, MED24 Y740 forms a hydrogen-bond with E70 of MED16. A hydrophobic patch between MED24 W741, I705 and MED16 A173, V172 is observed, as well as a charge interaction between MED24 H735 and MED16 R200.

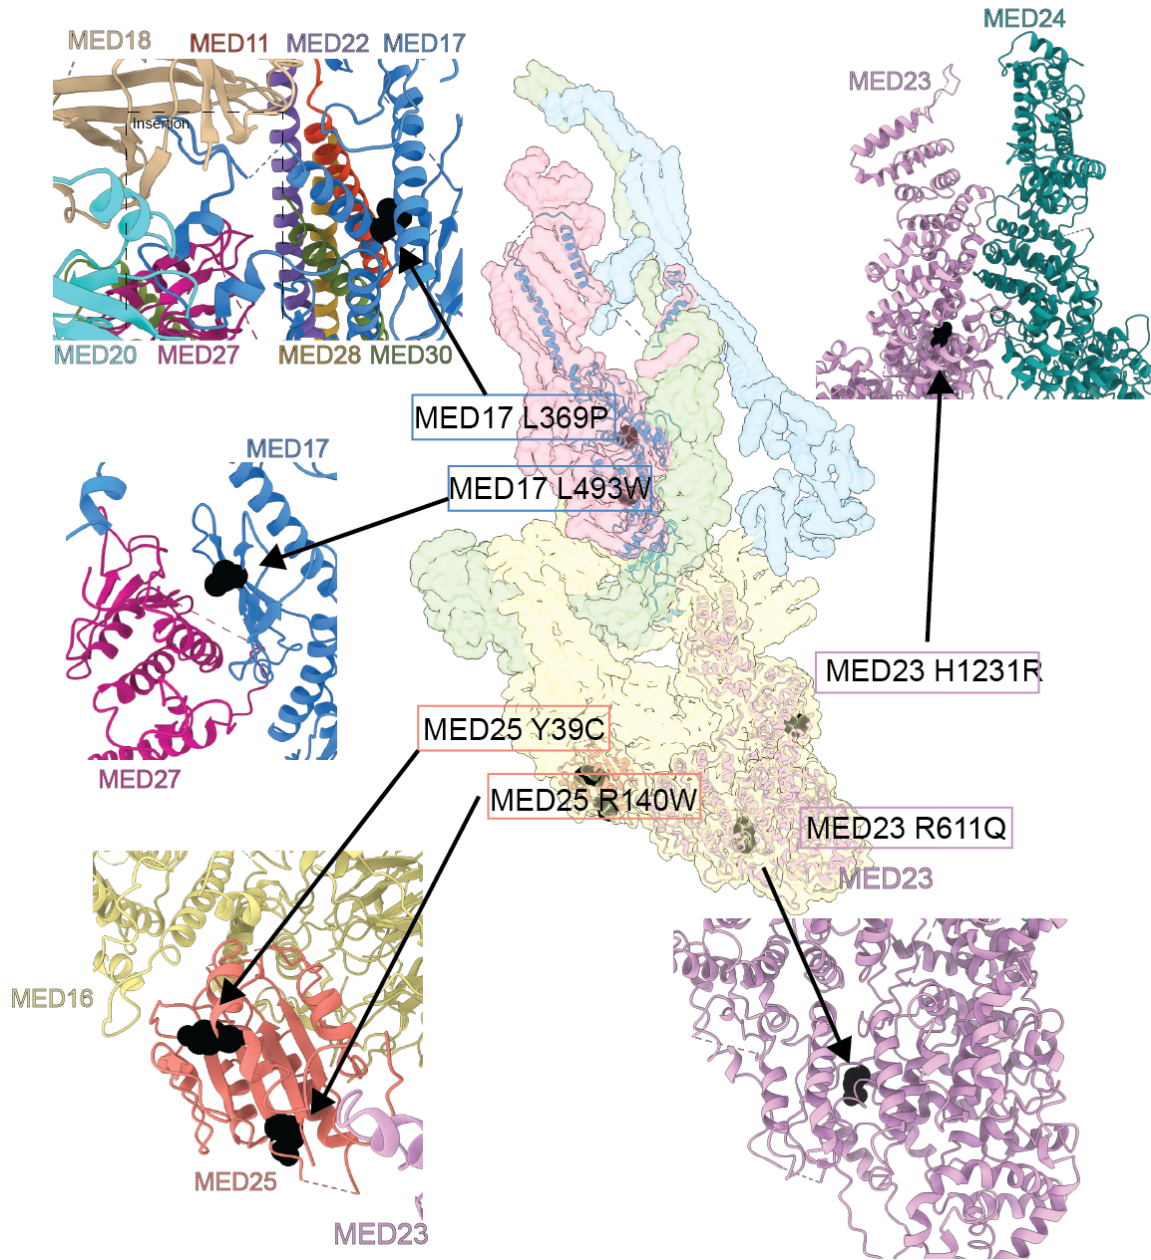

**Supplementary Figure 11. Disease-associated mMED mutations and mMED subunit IDRs. a,** Location of known disease-associated mammalian Mediator mutations.
